# Supplementary material for: Trends in Alcohol-Related Deaths by Sex in the US, 1999-2020
Source: PubMed Central journal article supplement (PMC10383009; doi:10.1001/jamanetworkopen.2023.26346), 2023-07-28
Supplement: jamanetwopen-e2326346-s001.pdf [file jamanetwopen-e2326346-s001.pdf]

## Supplementary Online Content

Karaye IM, Maleki N, Hassan N, Yunusa I. Trends in alcohol-related deaths by sex in the US, 1999-2020. *JAMA Netw Open.* 2023;6(7):e2326346.  
doi:10.1001/jamanetworkopen.2023.26346

**eTable.** *International Statistical Classification of Diseases and Related Health Problems, Tenth Revision (ICD-10), Codes for Alcohol-Related Death Counts in the United States, 1999-2020*

This supplementary material has been provided by the authors to give readers additional information about their work.

**eTable.** *International Statistical Classification of Diseases and Related Health Problems, Tenth Revision (ICD-10), Codes for Alcohol-Related Death Counts in the United States, 1999-2020*

| <sup>a</sup> ICD-10 Code                                                                                                                                                         | Description                                               | Total number of alcohol-related deaths (N=605,948) |
|----------------------------------------------------------------------------------------------------------------------------------------------------------------------------------|-----------------------------------------------------------|----------------------------------------------------|
| E24.4                                                                                                                                                                            | Alcohol-induced pseudo-Cushing syndrome                   | N/A                                                |
| F10                                                                                                                                                                              | Mental and behavioral disorders due to use of alcohol     | 173, 933                                           |
| G31.2                                                                                                                                                                            | Degeneration of nervous system due to alcohol             | 2,989                                              |
| G62.1                                                                                                                                                                            | Alcoholic polyneuropathy                                  | 130                                                |
| G72.1                                                                                                                                                                            | Alcoholic myopathy                                        | 38                                                 |
| I42.6                                                                                                                                                                            | Alcoholic cardiomyopathy                                  | 11,328                                             |
| K29.2                                                                                                                                                                            | Alcoholic gastritis                                       | 642                                                |
| K70                                                                                                                                                                              | Alcoholic liver disease                                   | 373, 302                                           |
| K85.2                                                                                                                                                                            | Alcohol-induced acute pancreatitis                        | 5,203                                              |
| K86.0                                                                                                                                                                            | Alcohol-induced chronic pancreatitis                      | 3,154                                              |
| R78.0                                                                                                                                                                            | Finding of alcohol in blood                               | 40                                                 |
| X45                                                                                                                                                                              | Accidental poisoning by and exposure to alcohol           | 33,190                                             |
| X65                                                                                                                                                                              | Intentional self-poisoning by and exposure to alcohol     | 815                                                |
| Y15                                                                                                                                                                              | Poisoning by and exposure to alcohol, undetermined intent | 1,177                                              |
| <sup>a</sup> ICD-10: International Classification of Diseases, 10 <sup>th</sup> Revision Codes<br><sup>N/A</sup> Mortality count unavailable due to data suppression constraints |                                                           |                                                    |
