# Supplementary material for: Trends in Alcohol-Related Deaths by Sex in the US, 1999-2020
Source: PubMed Central journal article supplement (PMC10383009; doi:10.1001/jamanetworkopen.2023.26346), 2023-07-28
Supplement: jamanetwopen-e2326346-s002.pdf [file jamanetwopen-e2326346-s002.pdf]

## Data Sharing Statement

Karaye. Trends in Alcohol-Related Deaths by Sex in the US, 1999-2020. *JAMA Netw Open*. Published July 28, 2023. doi:10.1001/jamanetworkopen.2023.26346

### Data

**Data available:** Yes

**Data types:** Data (not involving human participants)

**How to access data:** <https://wonder.cdc.gov/>

**When available:** With publication

### Supporting Documents

**Document types:** None

### Additional Information

**Who can access the data:** The dataset is publicly available on the CDC WONDER webpage

**Types of analyses:** Any purpose

**Mechanisms of data availability:** The dataset is publicly available on the CDC WONDER webpage

**Any additional restrictions:** None
